# Supplementary material for: Maternal mortality in eight European countries with enhanced surveillance systems: descriptive population based study
Source: PubMed Central journal article supplement — BMJ. 2022 Nov 16;379:e070621. doi: 10.1136/bmj-2022-070621 (PMC9667469; doi:10.1136/bmj-2022-070621), 2022-11-16
Supplement: digc070621.ww1.pdf [file digc070621.ww1.pdf]

Appendix 1: Definitions of live births and maternities in each country

|                    | Live births                                                                                                                                                                                                                                                                                                                                         | Maternities                                                                                                                                                                                                                                                                                                                                                                                                                                                                                                                                     |
|--------------------|-----------------------------------------------------------------------------------------------------------------------------------------------------------------------------------------------------------------------------------------------------------------------------------------------------------------------------------------------------|-------------------------------------------------------------------------------------------------------------------------------------------------------------------------------------------------------------------------------------------------------------------------------------------------------------------------------------------------------------------------------------------------------------------------------------------------------------------------------------------------------------------------------------------------|
| <b>Denmark</b>     | Live born baby at any gestational age                                                                                                                                                                                                                                                                                                               | A pregnancy resulting in a live birth at any gestational age or a stillbirth at or after 22 weeks of gestation                                                                                                                                                                                                                                                                                                                                                                                                                                  |
| <b>Finland</b>     | Live born baby at any gestational age                                                                                                                                                                                                                                                                                                               | A pregnancy resulting in a live birth at any gestational age or a stillbirth from 22+0 weeks of gestation or weighing 500 g                                                                                                                                                                                                                                                                                                                                                                                                                     |
| <b>France</b>      | Live born infant at or after 22 weeks of gestation or with a birth weight of at least 500g                                                                                                                                                                                                                                                          | A pregnancy resulting in the birth of one or more children at or after 22 weeks of gestation, live birth or stillbirth                                                                                                                                                                                                                                                                                                                                                                                                                          |
| <b>Italy</b>       | Product of conception which, once expelled or completely extracted from the maternal body, regardless of the duration of gestation, breathes or manifests other signs of life.                                                                                                                                                                      | Any delivery of live born or stillborn infant after 22 weeks of gestation                                                                                                                                                                                                                                                                                                                                                                                                                                                                       |
| <b>Netherlands</b> | An infant born alive from 22 weeks of gestation                                                                                                                                                                                                                                                                                                     | Any delivery of a live born or stillborn infant after 22 weeks of gestation                                                                                                                                                                                                                                                                                                                                                                                                                                                                     |
| <b>Norway</b>      | Any fetus born at or after 22+0 weeks of gestation, weighing more than 500 g and showing signs of life (heartbeat, breathing, or muscle activity).                                                                                                                                                                                                  | Pregnancy resulting in the birth of one or more children including stillbirths from 22+0 weeks of gestation or with a birth weight of 500 g or more                                                                                                                                                                                                                                                                                                                                                                                             |
| <b>Slovakia</b>    | The number of newborns with either<br>-a birth weight $\geq$ 500 g and one of the following (vital signs): breathing, heart action, umbilical cord pulsation or active muscle movements, even if the umbilical cord has not been cut or the placenta not delivered<br>-a birth weight < 500 g and the baby survives more than 24 hours after birth. | The number of pregnancies resulting in a birth of:<br>-a newborn with a birth weight $\geq$ 500 g and with one of the following (vital signs): breathing, heart action, umbilical cord pulsation or active muscle movements, even if the umbilical cord has not been cut or the placenta not delivered<br>-a live born infant weighing < 500 g with one of the above vital signs and surviving > 24 hours<br>-a stillbirth with a birth weight $\geq$ 1000 g and or an estimated gestational age >28 weeks if the birth weight is undetermined. |
| <b>UK</b>          | A baby showing signs of life at birth.                                                                                                                                                                                                                                                                                                              | A pregnancy resulting in the birth of one or more live born or stillborn children. Therefore, the number of maternities (and paternities) is less than the total number of live births and stillbirths.                                                                                                                                                                                                                                                                                                                                         |

Appendix 2: Availability of data regarding the women’s age and ethnic background for maternal deaths (MD) and livebirths (LB) in each country

|                  | Denmark |     | Finland |     | France |     | Italy |     | Netherlands      |     | Norway |     | Slovakia |     | UK           |     |
|------------------|---------|-----|---------|-----|--------|-----|-------|-----|------------------|-----|--------|-----|----------|-----|--------------|-----|
|                  | MD      | LB  | MD      | LB  | MD     | LB  | MD    | LB  | MD               | LB  | MD     | LB  | MD       | LB  | MD           | LB  |
| Age              | Yes     | Yes | Yes     | Yes | Yes    | Yes | Yes   | Yes | Yes              | Yes | Yes    | Yes | Yes      | Yes | Yes          | Yes |
| Citizenship      |         |     | Yes     | Yes | Yes    | Yes | Yes   | Yes |                  |     | Yes    | Yes | Yes      | Yes | Yes          |     |
| Country of birth | Yes     | Yes | Yes     | Yes | Yes    | Yes |       |     |                  |     | Yes    | Yes | Yes      | Yes | Yes          | Yes |
| Ethnicity        |         |     |         |     |        |     |       |     | Defined by carer | Yes |        |     |          |     | Self defined | Yes |

Appendix 3: Number of maternal deaths per age group and age-specific maternal mortality ratios, in countries with enhanced surveillance systems\*

| Age (years) | Denmark |                    | Finland |                     | France |                     | Italy |                     | Netherlands |                     | Norway |                   | Slovakia |                     | UK |                     |
|-------------|---------|--------------------|---------|---------------------|--------|---------------------|-------|---------------------|-------------|---------------------|--------|-------------------|----------|---------------------|----|---------------------|
|             | n       | MMR <sup>°°</sup>  | n       | MMR <sup>°°</sup>   | n      | MMR <sup>°°</sup>   | n     | MMR <sup>°°</sup>   | n           | MMR <sup>°°</sup>   | n      | MMR <sup>°°</sup> | n        | MMR <sup>°°</sup>   | n  | MMR <sup>°°</sup>   |
| <20         | 0       | 0.0 [0 to 121.0]   | 3       | 44.9 [9.2 to 131.0] | 4      | 9.3 [2.5 to 23.9]   | 3     | 13.6 [2.8 to 39.9]  | 3           | 38.9 [8.0 to 113.7] | 0      | 0.0 [0 to 122.0]  | 2        | 11.3 [1.4 to 40.9]  | 8  | 11.5 [5.0 to 22.7]  |
| 20-24       | 2       | 6.3 [0.8 to 22.6]  | 7       | 15.2 [6.1 to 31.4]  | 11     | 3.8 [1.9 to 6.8]    | 10    | 8.5 [4.1 to 15.6]   | 3           | 4.1 [0.8 to 11.9]   | 0      | 0.0 [0 to 114.5]  | 2        | 4.5 [0.5 to 16.3]   | 19 | 5.9 [3.5 to 9.2]    |
| 25-29       | 1       | 1.0 [0.03 to 5.8]  | 3       | 3.1 [0.6 to 9.2]    | 33     | 4.5 [3.1 to 6.3]    | 14    | 4.9 [2.7 to 8.2]    | 11          | 4.3 [2.1 to 7.7]    | 2      | 2.1 [0.3 to 7.7]  | 8        | 9.4 [4.0 to 18.6]   | 57 | 9.1 [6.9 to 11.7]   |
| 30-34       | 3       | 3.0 [0.6 to 8.7]   | 4       | 4.1 [1.1 to 10.5]   | 63     | 7.7 [5.9 to 9.8]    | 29    | 6.9 [4.6 to 7.7]    | 14          | 4.3 [2.4 to 7.3]    | 2      | 2.0 [0.2 to 7.2]  | 8        | 9.1 [3.9 to 17.9]   | 52 | 7.2 [5.4 to 9.4]    |
| 35-39       | 2       | 3.9 [0.5 to 14.2]  | 4       | 8.9 [4.5 to 22.9]   | 60     | 14.1 [10.8 to 18.1] | 32    | 10 [6.8 to 14.0]    | 8           | 5.3 [2.3 to 10.5]   | 3      | 6.2 [1.3 to 18.1] | 8        | 19.3 [8.3 to 37.9]  | 55 | 13.2 [9.9 to 17.2]  |
| ≥40         | 2       | 17.4 [2.1 to 62.9] | 1       | 9.2 [0.2 to 51.1]   | 25     | 20.2 [13.1 to 29.8] | 23    | 23.3 [14.8 to 34.9] | 1           | 3.5 [0.9 to 19.7]   | 1      | 9.3 [0.2 to 52.1] | 3        | 39.4 [8.1 to 115.0] | 26 | 26.8 [17.5 to 39.3] |

\* Maternal mortality up to 42 days after the end of pregnancy

°° MMR maternal mortality ratios per 100 000 live births with [95% Confidence Interval] or one-sided [97.5%CI]

Appendix 4 Maternal mortality by women's migrant or minoritized ethnic background according to various categorizations (numbers and maternal mortality ratios), in countries with enhanced surveillance\*

|                      | Denmark |                   | France |                    | Italy |                   | Netherlands |                   | Norway |                   | UK  |                    |
|----------------------|---------|-------------------|--------|--------------------|-------|-------------------|-------------|-------------------|--------|-------------------|-----|--------------------|
|                      | n       | MMR <sup>°°</sup> | n      | MMR <sup>°°</sup>  | n     | MMR <sup>°°</sup> | n           | MMR <sup>°°</sup> | n      | MMR <sup>°°</sup> | n   | MMR <sup>°°</sup>  |
| National citizenship |         | NA                | 135    | 6.6 [5.7 to 7.8]   | 76    | 7.4[5.8 to 9.2]   |             | NA                | 6      | 2.6[0.9 to 5.8]   |     | NA                 |
| Foreign citizenship  |         | NA                | 54     | 14.2[10.7 to 18.5] | 28    | 11.8[7.8 to 17.0] |             | NA                | 2      | 3.2[0.3 to 11.6]  |     | NA                 |
| Born in country      | 7       | 3.0 [1.2 to 6.2]  | 117    | 6.1[5.0 to 7.8]    |       | NA                |             | NA                | 6      | 2.9[1.1 to 6.4]   | 144 | 8.7 [7.3 to 10.2]  |
| Born abroad          | 3       | 5.8 [1.2 to 16.9] | 71     | 13.8[10.8 to 17.5] |       | NA                |             | NA                | 2      | 2.3[0.2 to 8.1]   | 50  | 8.1[6.0 to 10.7]   |
| White                |         | NA                |        | NA                 |       | NA                | 21          | 3.6[2.3 to 5.4]   |        | NA                | 117 | 7.9[6.5 to 9.4]    |
| Other ethnicity      |         | NA                |        | NA                 |       | NA                | 18          | 11.0[6.5 to 17.3] |        | NA                | 70  | 18.4[14.4 to 23.3] |

NA: not available

\* Maternal mortality up to 42 days after the end of pregnancy

<sup>°°</sup>MMR maternal mortality ratios per 100 000 live births with [95% Confidence Interval]

Appendix 5 Cause-specific maternal mortality up to one year (numbers, proportion of all maternal deaths and maternal mortality ratios) in countries with enhanced surveillance systems that identify, review and classify maternal deaths up to 1 year

|                                             | France             |                   | UK                  |                   |
|---------------------------------------------|--------------------|-------------------|---------------------|-------------------|
| Number of livebirths                        | 2 435 583          |                   | 2 261 090           |                   |
| Total number of maternal deaths             | 262                |                   | 432                 |                   |
| All cause MMR <sup>oo</sup>                 | 10.8 [9.5 to 12.1] |                   | 19.1 [17.0 to 21.0] |                   |
|                                             | n(%)               | MMR <sup>oo</sup> | n                   | MMR <sup>oo</sup> |
| Abortive outcomes*                          | 9(3.4)             | 0.4[0.2 to 0.7]   | 8(1.9)              | 0.4[0.2 to 0.7]   |
| Obstetric haemorrhage**                     | 22(8.4)            | 0.9[0.6 to 13.7]  | 14(3.2)             | 0.6[0.3 to 1.0]   |
| Pregnancy related infection                 | 11(4.2)            | 0.5[0.2 to 0.8]   | 12(2.8)             | 0.5[0.3 to 0.9]   |
| Hypertensive disorders of pregnancy***      | 4(1.5)             | 0.2[0.0 to 0.4]   | 4(0.9)              | 0.2[0.0 to 0.4]   |
| Venous thrombosis and thromboembolism       | 22(8.4)            | 0.9[0.6 to 1.4]   | 47(10.9)            | 2.1[1.5 to 2.8]   |
| Amniotic fluid embolism                     | 28(10.7)           | 1.2[0.8 to 1.7]   | 6(1.4)              | 0.3[0.0 to 0.5]   |
| Anaesthesia complication                    | 4(1.5)             | 0.2[0.0 to 0.4]   | 1(0.2)              | /                 |
| Other direct cause                          | 6(2.3)             | 0.2[0.0 to 0.5]   | 1(0.2)              | /                 |
| Cardiovascular ††                           | 36(13.7)           | 1.5[1.0 to 2.0]   | 86(19.9)            | 3.8[3.0 to 4.7]   |
| Stroke (arterial) haemorrhagic or ischaemic | 13(5.0)            | 0.5[0.2 to 0.9]   | 27(6.3)             | 1.2[0.7 to 1.7]   |
| Indirect sepsis †††                         | 10(3.8)            | 0.4[0.2 to 0.8]   | 18(4.2)             | 0.8[0.5 to 1.2]   |
| Malignancy ††††                             | 18(6.9)            | 0.7[0.4 to 1.2]   | 27(6.3)             | 1.2[0.7 to 1.7]   |
| Other indirect cause                        | 8(3.1)             | 0.3[0.1 to 0.6]   | 56(13.0)            | 2.5[1.9 to 3.2]   |
| Suicide                                     | 35(13.4)           | 1.4[0.1 to 2.0]   | 66(15.3)            | 2.9[2.2 to 3.7]   |
| Illicit drug or alcohol abuse               | 2(0.8)             | 0.1[0.0 to 0.2]   | 56(13.0)            | 2.5[1.9 to 3.2]   |
| Unascertained                               | 34(13.0)           | 1.4[1.0 to 1.9]   | 3(0.7)              | 0.1[0.0 to 0.4]   |

\*Abortive outcomes: Ectopic pregnancy, post-abortion (spontaneous, elective, and medically indicated) haemorrhage, post-abortion infection, post-abortion pulmonary embolism, and other abortive outcomes

\*\*Haemorrhage by uterine atony, morbidly adherent placenta, placenta praevia, uterine rupture, placenta abruption, and other obstetric haemorrhage

\*\*\* Preeclampsia, eclampsia, HELLP

†† Influenza, pneumonia, meningitis, urinary sepsis, and other indirect sepsis

††† In the 2 countries, deaths after trophoblastic tumours were considered as maternal. For other tumours, definitions of a maternal death varied between countries. In France maternal deaths were the pregnancy associated deaths from all hormone sensitive cancers or any other type of cancer for which the pregnancy delayed the diagnosis or treatment. The UK's definition of a maternal death due to cancer were the pregnancy-associated deaths after cancer of the breast, ovary, or uterus.

<sup>oo</sup>MMR maternal mortality ratio per 100 000 live births with [95% Confidence Interval]

Appendix 6: Cause-specific maternal mortality ratios up to one year after the end of pregnancy per 100 000 live births in countries with enhanced surveillance systems reviewing late maternal deaths up to one year \*

\* Maternal mortality up to one year after the end of pregnancy

Error bars represent 95% Confidence Intervals of all-cause MMRs up to 1 year

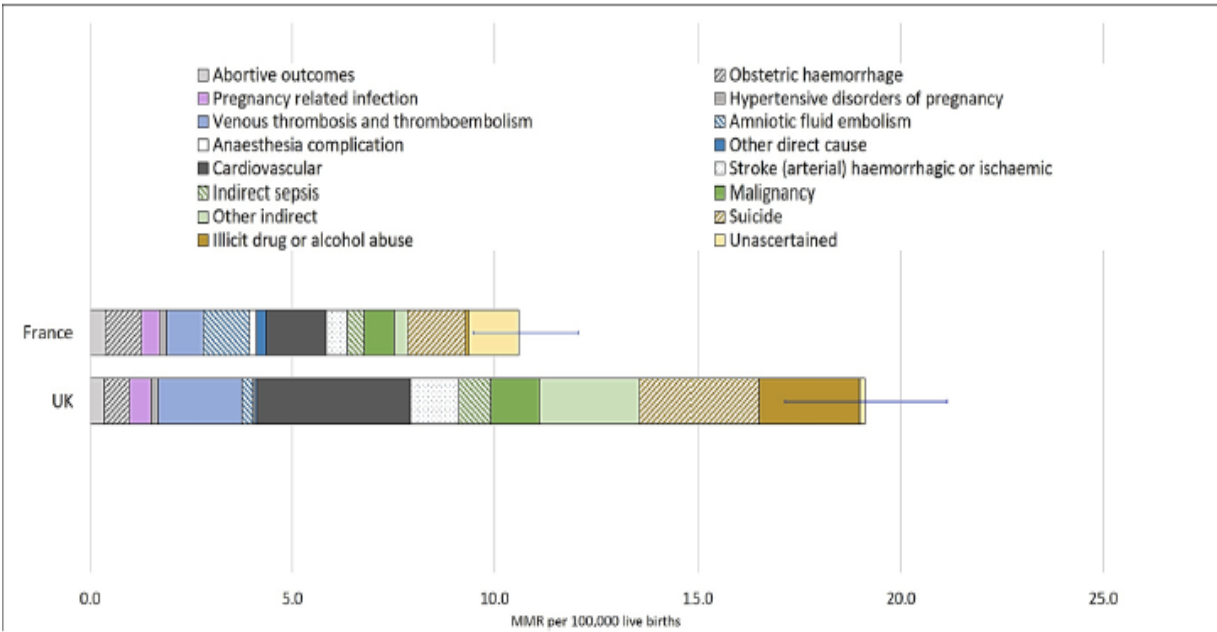

Appendix 7: Distribution of maternal age among all live births during the study period in the eight countries

| Age (years) | Denmark |      | Finland |      | France  |      | Italy   |      | Netherlands |      | Norway  |      | Slovakia |      | UK      |      |
|-------------|---------|------|---------|------|---------|------|---------|------|-------------|------|---------|------|----------|------|---------|------|
|             | n       | %    | n       | %    | n       | %    | n       | %    | n           | %    | n       | %    | n        | %    | n       | %    |
| <20         | 3030    | 1.0  | 6688    | 2.2  | 42 857  | 1.8  | 21 985  | 1.7  | 7710        | 0.9  | 3002    | 1.0  | 17 641   | 6.2  | 69 367  | 3.1  |
| 20-24       | 31 960  | 10.9 | 45 918  | 15.2 | 287 307 | 11.8 | 118 100 | 9.3  | 73 401      | 8.8  | 32 229  | 11.2 | 44 174   | 15.6 | 323 205 | 14.3 |
| 25-29       | 95 794  | 32.6 | 95 607  | 31.7 | 731 248 | 30.1 | 285 346 | 22.5 | 255 896     | 30.5 | 93 802  | 32.5 | 84 681   | 29.8 | 629 648 | 27.8 |
| 30-34       | 100 619 | 34.2 | 97 305  | 32.3 | 818 251 | 33.7 | 421 939 | 33.3 | 322 675     | 38.5 | 100 619 | 34.8 | 88 126   | 31.1 | 724 832 | 32.1 |
| 35-39       | 51 071  | 17.4 | 44 759  | 14.9 | 425 516 | 17.5 | 321 503 | 25.4 | 150 099     | 17.9 | 48 384  | 16.8 | 41 558   | 14.6 | 417 086 | 18.4 |
| ≥40         | 11 485  | 3.9  | 10 892  | 3.6  | 123 844 | 5.1  | 98 723  | 7.8  | 28 286      | 3.4  | 10 686  | 3.7  | 7620     | 2.7  | 96 924  | 4.3  |

Appendix 8: Distribution of women's migrant or minoritized ethnic background among all live births during the study period in the eight countries

|                            | Denmark |      | Finland |      | France    |      | Italy     |       | Netherlands |      | Norway  |      | Slovakia |       | UK        |      |
|----------------------------|---------|------|---------|------|-----------|------|-----------|-------|-------------|------|---------|------|----------|-------|-----------|------|
|                            | n       | %    | n       | %    | n         | %    | n         | %     | n           | %    | n       | %    | n        | %     | n         | %    |
| <b>Current citizenship</b> |         |      |         |      |           |      |           |       |             |      |         |      |          |       |           |      |
| Not foreign                | NA      |      | NA      |      | 2 048 988 | 84.4 | 1 027 397 | 81 .2 | NA          |      | 226 411 | 78.4 | 283 825  | 99.96 | NA        |      |
| Foreign                    | NA      |      | NA      |      | 380 035   | 19.8 | 237 868   | 18.8  | NA          |      | 62 372  | 21.6 | 105      | 0.04  | NA        |      |
| <b>Place of Birth</b>      |         |      |         |      |           |      |           |       |             |      |         |      |          |       |           |      |
| Born in country            | 233 050 | 81.8 | 276 852 | 91.9 | 1 916 321 | 78.9 | NA        |       | NA          |      | 203 758 | 69.7 | 283 825  | 99.96 | 1 656 483 | 73.0 |
| Born abroad                | 51 976  | 18.2 | 24 317  | 8.1  | 512 702   | 21.1 | NA        |       | NA          |      | 88 557  | 30.3 | 105      | 0.04  | 613 882   | 27.0 |
| <b>Ethnicity</b>           |         |      |         |      |           |      |           |       |             |      |         |      |          |       |           |      |
| White                      | NA      |      | NA      |      | NA        |      | NA        |       | 660 516     | 80.1 | NA      |      | NA       |       | 1 486 428 | 79.6 |
| Other                      | NA      |      | NA      |      | NA        |      | NA        |       | 163 914     | 19.9 | NA      |      | NA       |       | 379 942   | 20.4 |

NA: not available
